# Supplementary material
Source: Elsevier journal article supplement (https://www.sciencedirect.com/science/article/pii/S2173572722000170)
Supplement: mmc1 [file S2173572722000170:mmc1.pdf]

**Supplementary Table 1** Spanish version of the Measure of Moral Distress – Healthcare Professionals questionnaire (MMD-HP-SPA).

El "desasosiego moral" ocurre cuando, debido a restricciones o barreras, los profesionales no pueden llevar a cabo lo que creen que son acciones éticamente apropiadas. Este cuestionario enumera algunas situaciones que ocurren en la práctica clínica que, en el caso de haberlas experimentado, pueden haberte causado o no, desasosiego moral. Por favor, indica con qué frecuencia has experimentado cada una de estas situaciones. Además, indica el nivel de desasosiego que te genera cada situación. Si nunca has experimentado una situación en particular, marca "0" (nunca) en la columna de la frecuencia. Aunque no hayas experimentado una situación concreta, indica el nivel de desasosiego que te produciría en el caso de que te ocurriera durante la práctica clínica. Ten en cuenta que para cada situación deberás responder en las dos dimensiones señaladas: “*Frecuencia con que te ocurre*” y “*Nivel de Desasosiego*”.

|                                                                                                                                                                                                 | Frecuencia |   |   |               |   | Nivel de Desasosiego |   |   |       |   |
|-------------------------------------------------------------------------------------------------------------------------------------------------------------------------------------------------|------------|---|---|---------------|---|----------------------|---|---|-------|---|
|                                                                                                                                                                                                 | Nunca      |   |   | Muy frecuente |   | Ninguno              |   |   | Mucho |   |
|                                                                                                                                                                                                 | 0          | 1 | 2 | 3             | 4 | 0                    | 1 | 2 | 3     | 4 |
| 1. Estar presente cuando el paciente o su familia reciben "falsas esperanzas" por parte de profesionales sanitarios.                                                                            |            |   |   |               |   |                      |   |   |       |   |
| 2. Ceder ante la insistencia de la familia y continuar un tratamiento agresivo, incluso creyendo que esto no es lo mejor para el paciente.                                                      |            |   |   |               |   |                      |   |   |       |   |
| 3. Sentirse presionado/a para pautar o llevar a cabo órdenes, que yo considero pruebas o tratamientos innecesarios o inapropiados.                                                              |            |   |   |               |   |                      |   |   |       |   |
| 4. No poder proporcionar una atención óptima debido a las presiones de los administradores para reducir los gastos.                                                                             |            |   |   |               |   |                      |   |   |       |   |
| 5. Continuar proporcionando un tratamiento agresivo a una persona que tiene muchas probabilidades de morir, independientemente de este tratamiento, cuando nadie toma la decisión de retirarlo. |            |   |   |               |   |                      |   |   |       |   |
| 6. Ser presionado/a para no tomar medidas cuando sé que un/a médico, enfermera/o u otro miembro del equipo ha cometido un error y no lo comunica.                                               |            |   |   |               |   |                      |   |   |       |   |
| 7. Ser requerido/a para atender a pacientes que no me siento calificado/a para atender.                                                                                                         |            |   |   |               |   |                      |   |   |       |   |
| 8. Participar en cuidados que causen sufrimiento innecesario o que no alivien adecuadamente el dolor u otros síntomas.                                                                          |            |   |   |               |   |                      |   |   |       |   |
| 9. Observar un deterioro en la calidad de la atención del paciente debido a la falta de continuidad del personal sanitario.                                                                     |            |   |   |               |   |                      |   |   |       |   |
| 10. Cumplir la petición de un médico o un miembro de la familia para no comentar el pronóstico del paciente con él mismo o su familia.                                                          |            |   |   |               |   |                      |   |   |       |   |
| 11. Ser testigo del incumplimiento de un estándar de práctica clínica o una norma deontológica y no sentirse lo suficientemente respaldado para informar sobre dicho incumplimiento.            |            |   |   |               |   |                      |   |   |       |   |

|                                                                                                                                                                 | Frecuencia |   |   |   |               | Nivel de Desasosiego |   |   |       |   |
|-----------------------------------------------------------------------------------------------------------------------------------------------------------------|------------|---|---|---|---------------|----------------------|---|---|-------|---|
|                                                                                                                                                                 | Nunca      |   |   |   | Muy frecuente | Ninguno              |   |   | Mucho |   |
|                                                                                                                                                                 | 0          | 1 | 2 | 3 | 4             | 0                    | 1 | 2 | 3     | 4 |
| 12. Participar, por temor a demandas/juicios, en tratamientos con los que no estoy de acuerdo.                                                                  |            |   |   |   |               |                      |   |   |       |   |
| 13. Tener que trabajar con otros miembros del equipo sanitario que no tienen la competencia que la atención al paciente requiere.                               |            |   |   |   |               |                      |   |   |       |   |
| 14. Observar una baja calidad en la atención proporcionada al paciente debido a la mala comunicación del equipo.                                                |            |   |   |   |               |                      |   |   |       |   |
| 15. Sentirse presionado/a para ignorar situaciones en las que los pacientes no han recibido una información adecuada que garantice el consentimiento informado. |            |   |   |   |               |                      |   |   |       |   |
| 16. Tener que atender a más pacientes de los que puedo atender de forma segura.                                                                                 |            |   |   |   |               |                      |   |   |       |   |
| 17. Ver comprometida la atención del paciente debido a la falta de recursos, equipamiento o disponibilidad de camas.                                            |            |   |   |   |               |                      |   |   |       |   |
| 18. Experimentar la inacción o la falta de apoyo administrativo en un problema que compromete la atención al paciente.                                          |            |   |   |   |               |                      |   |   |       |   |
| 19. Tener que cumplir requisitos de documentación / administrativos excesivos que comprometen la atención al paciente.                                          |            |   |   |   |               |                      |   |   |       |   |
| 20. Tener miedo a represalias si digo lo que se pienso.                                                                                                         |            |   |   |   |               |                      |   |   |       |   |
| 21. Sentirme inseguro/a o intimidado/a entre mis propios compañeros/as.                                                                                         |            |   |   |   |               |                      |   |   |       |   |
| 22. Tener que trabajar con pacientes o familiares agresivos o maleducados que comprometen la calidad de la atención.                                            |            |   |   |   |               |                      |   |   |       |   |
| 23. Sentirse obligado/a a darle demasiada importancia a competencias y a la productividad o a medidas de calidad a expensas de la atención al paciente.         |            |   |   |   |               |                      |   |   |       |   |
| 24. Tener que atender a pacientes con planes de tratamiento poco claros o incongruentes, o que carecen de objetivos terapéuticos.                               |            |   |   |   |               |                      |   |   |       |   |
| 25. Trabajar en equipos, unidades e instituciones con jerarquías de poder que comprometen la atención del paciente.                                             |            |   |   |   |               |                      |   |   |       |   |
| 26. Participar en un equipo que da mensajes contradictorios a un paciente o su familia.                                                                         |            |   |   |   |               |                      |   |   |       |   |
| 27. Trabajar con miembros del equipo que no tratan con dignidad y respeto a los pacientes vulnerables o estigmatizados.                                         |            |   |   |   |               |                      |   |   |       |   |
| Si existen otras situaciones en las que hayas sentido desasosiego moral, escríbelas y califícalas aquí:                                                         |            |   |   |   |               |                      |   |   |       |   |
|                                                                                                                                                                 |            |   |   |   |               |                      |   |   |       |   |
